# Supplementary material
Source: PubMed Central journal article supplement (PMC3570521)
Supplement: cc-12-88-s01.pdf [file cc-12-88-s01.pdf]

## **Supplemental Material to:**

**Wei Ma, Jing Ma, Jie Xu, Chong Qiao, Adam Branscum,  
Andres Cardenas, Andre T. Baron, Peter Schwartz,  
Nita J. Maihle and Yingqun Huang**

**Lin28 regulates BMP4 and functions with Oct4  
to affect ovarian tumor microenvironment**

**Cell Cycle 2012; 12(1)**

**<http://dx.doi.org/10.4161/cc.23028>**

**<http://www.landesbioscience.com/journals/cc/article/23028>**

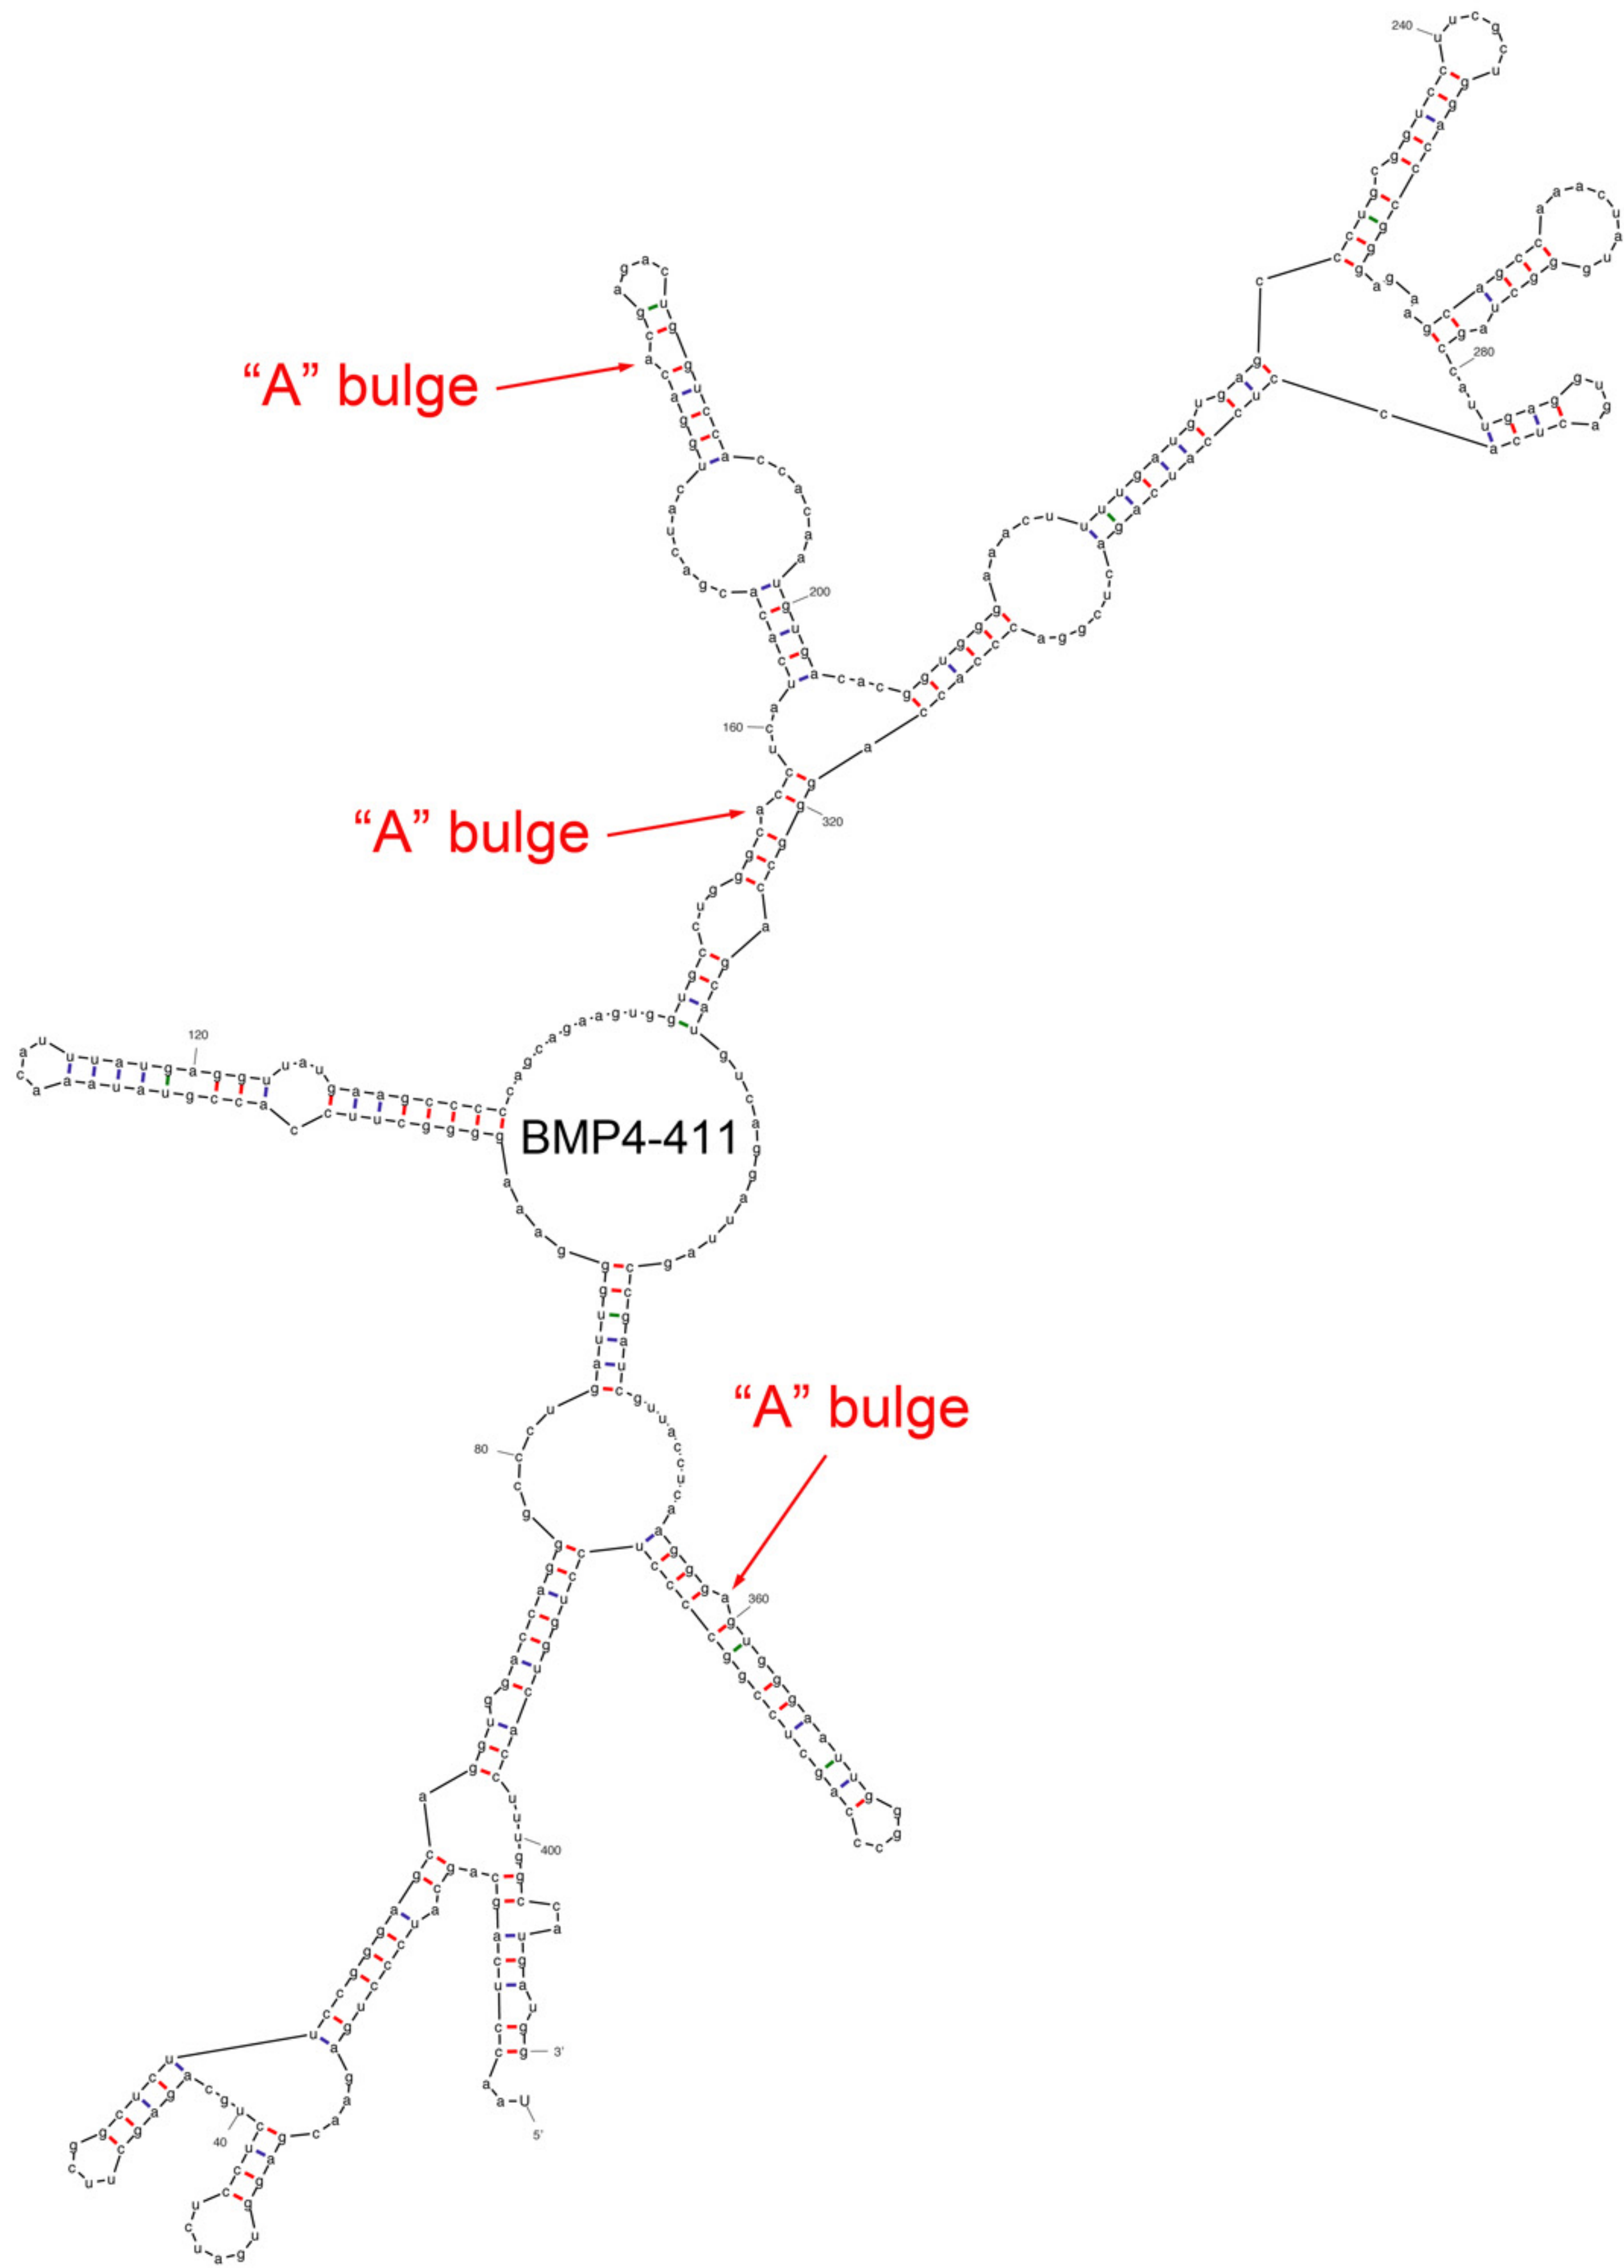



**Table S1. Characteristics of Yale Ovarian Cancer Cohort (N=343)**

|                                    |                                   | <b>Kruskal-Wallis or Wilcoxon-Rank sum test</b> |                               |
|------------------------------------|-----------------------------------|-------------------------------------------------|-------------------------------|
| <b>Variable</b>                    | <b>Patient number (N)</b>         | Lin28 Expression:<br>mean (SD)                  | Oct4 Expression:<br>mean (SD) |
| <b>Race</b>                        | <b>331</b>                        | P-value (0.423)                                 | P-value (0.238)               |
| White                              | 308                               | 425.00 (586.76)                                 | 66.54 (91.57)                 |
| Black                              | 8                                 | 477.04 (802.21)                                 | 26.55 (38.30)                 |
| Other                              | 15                                | 562.43 (526.66)                                 | 62.87 (51.71)                 |
| <b>Category of Specimen</b>        | <b>343</b>                        | P-value (0.469)                                 | P-value (0.194)               |
| Fallopian Tube                     | 16                                | 467.86 (658.19)                                 | 102.77 (101.06)               |
| EOC                                | 285                               | 450.09 (605.75)                                 | 66.26 (93.59)                 |
| LMP                                | 5                                 | 234.25 (523.80)                                 | 44.40 (60.92)                 |
| Non-Gyn                            | 15                                | 322.20 (430.82)                                 | 36.23 (44.67)                 |
| Other Gyn                          | 22                                | 298.49 (316.05)                                 | 64.06 (52.25)                 |
| <b>Bilateral Involvement (BOI)</b> | <b>326</b>                        | P-value (0.743)                                 | P-value (0.298)               |
| Yes                                | 169                               | 415.84 (560.72)                                 | 73.36 (109.27)                |
| No                                 | 157                               | 452.43 (611.09)                                 | 59.08 (67.17)                 |
| <b>Histology</b>                   | <b>320</b>                        | P-value (0.342)                                 | P-value (0.845)               |
| Serous                             | 142                               | 395.90 (446.59)                                 | 67.42 (104.45)                |
| Mucinous                           | 16                                | 303.76 (446.16)                                 | 52.88 (56.75)                 |
| Endometrioid                       | 71                                | 459.15 (694.62)                                 | 63.19 (61.43)                 |
| Clear Cell                         | 28                                | 693.67 (931.00)                                 | 55.10 (61.74)                 |
| Transitional                       | 5                                 | 343.23 (577.74)                                 | 21.55 (48.20)                 |
| Mixed                              | 39                                | 488.21 (695.63)                                 | 77.34 (109.67)                |
| Other                              | 19                                | 367.70 (447.43)                                 | 68.16 (99.80)                 |
| <b>Stage</b>                       | <b>337</b>                        | P-value (0.406)                                 | P-value (0.811)               |
| I                                  | 62                                | 479.27 (598.56)                                 | 67.55 (75.06)                 |
| II                                 | 40                                | 532.48 (833.26)                                 | 79.02 (173.88)                |
| III                                | 147                               | 449.64 (584.61)                                 | 62.82 (63.48)                 |
| IV                                 | 53                                | 359.73 (462.25)                                 | 72.96 (102.45)                |
| MET                                | 35                                | 291.55 (362.16)                                 | 50.38 (50.29)                 |
| <b>Grade</b>                       | <b>336</b>                        | P-value (0.785)                                 | P-value (0.151)               |
| 1                                  | 32                                | 375.86 (488.45)                                 | 52.46 (63.86)                 |
| 2                                  | 79                                | 448.61 (649.96)                                 | 49.40 (47.66)                 |
| 3                                  | 225                               | 437.78 (582.53)                                 | 70.19 (79.96)                 |
| <b>Chemo Regimen</b>               | <b>255</b>                        | P-value (0.126)                                 | P-value (0.825)               |
| No treatment after surgery         | 40                                | 501.79 (637.48)                                 | 57.29 (56.77)                 |
| Adriamycin + Platinum or CAP       | 54                                | 239.65 (280.27)                                 | 55.35 (66.73)                 |
| Platinum/Taxol                     | 43                                | 567.08 (798.46)                                 | 68.35 (67.48)                 |
| Cytosin/Platinum                   | 64                                | 437.99 (474.69)                                 | 69.85 (96.61)                 |
| Other chemo regimen                | 34                                | 332.44 (275.31)                                 | 69.58 (78.01)                 |
| XRT as first treatment             | 20                                | 312.00 (275.48)                                 | 66.69 (55.59)                 |
| <b>Age</b>                         | <b>343</b>                        | Spearman Correlation (P-value)                  |                               |
| Mean, Median, SD,[ Range]          | 60.78,62,13.27, [18-91]           | 0.0192 (0.729)                                  | -0.0325 (0.548)               |
| <b>Lin28</b>                       | <b>343</b>                        |                                                 |                               |
| Mean, Median, SD,[ Range]          | 668.16,504.98,610.68, [0-4889.49] | -----                                           | 0.432 (<0.001)                |
| <b>Oct4</b>                        | <b>343</b>                        |                                                 |                               |
| Mean, Median, SD,[ Range]          | 110.22,87.88,93.15, [0-1063.58]   | 0.432 (<0.001)                                  | -----                         |



| <b>Covariates</b> | <b>Univariate Model</b> |        | <b>Multivariate Model</b> |              |
|-------------------|-------------------------|--------|---------------------------|--------------|
|                   | PFS                     | OS     | PFS                       | OS           |
| Age               | <0.001                  | <0.001 | <0.001                    | <0.001       |
| Stage             | <0.001                  | <0.001 | <0.001                    |              |
| Grade             | <0.001                  | <0.001 |                           |              |
| Histology         | <0.001                  | <0.001 |                           |              |
| BOI               | <0.001                  | <0.001 |                           |              |
| Category          | 0.091                   | 0.158  |                           |              |
| Lin28             | 0.866                   | 0.868  | 0.149                     | 0.103        |
| Oct4              | 0.529                   | 0.409  | 0.081                     | 0.137        |
| <b>Lin28/Oct4</b> |                         |        | <b>0.038</b>              | <b>0.036</b> |

| <b>Variables</b>                | <b>Progression Free Survival</b> | <b>Overall Survival</b>     |
|---------------------------------|----------------------------------|-----------------------------|
|                                 | OR (95% CI)                      | HR (95% CI)                 |
| <b>High Lin28 / High Oct4</b>   | <b>3.027 (1.004, 9.127)</b>      | <b>2.058 (1.000, 4.239)</b> |
| High Lin28 / No Oct4            | 1.129 (0.550, 2.315)             | 0.752 (0.348, 1.626)        |
| No Lin28 / High Oct4 (referent) | 1.000                            | 1.000                       |
| High Lin28 / Medium Oct4        | 1.799 (0.856, 3.779)             | 1.338 (0.805, 2.225)        |
| Medium Lin28 / High Oct4        | 1.578 (1.001, 2.486)             | 1.346 (1.000, 1.813)        |
| Medium Lin28 / Medium Oct4      | 1.557 (0.940, 2.580)             | 1.283 (0.897, 1.836)        |
| Medium Lin28 / No Oct4          | 1.539 (0.817, 2.899)             | 1.230 (0.753, 2.008)        |
| No Lin28 / Medium Oct4          | 1.408 (0.958, 2.069)             | 1.246 (0.932, 1.667)        |
| No Lin28 / No Oct4              | 1.913 (0.922, 3.969)             | 1.518 (0.876, 2.629)        |
